# Supplementary material
Source: PubMed Central journal article supplement (PMC7787544)
Supplement: sj-pdf-1-ebm-10.1177_1535370220950639.pdf [file sj-pdf-1-ebm-10.1177_1535370220950639.pdf]

# Supplementary Figures and Table

**A.**

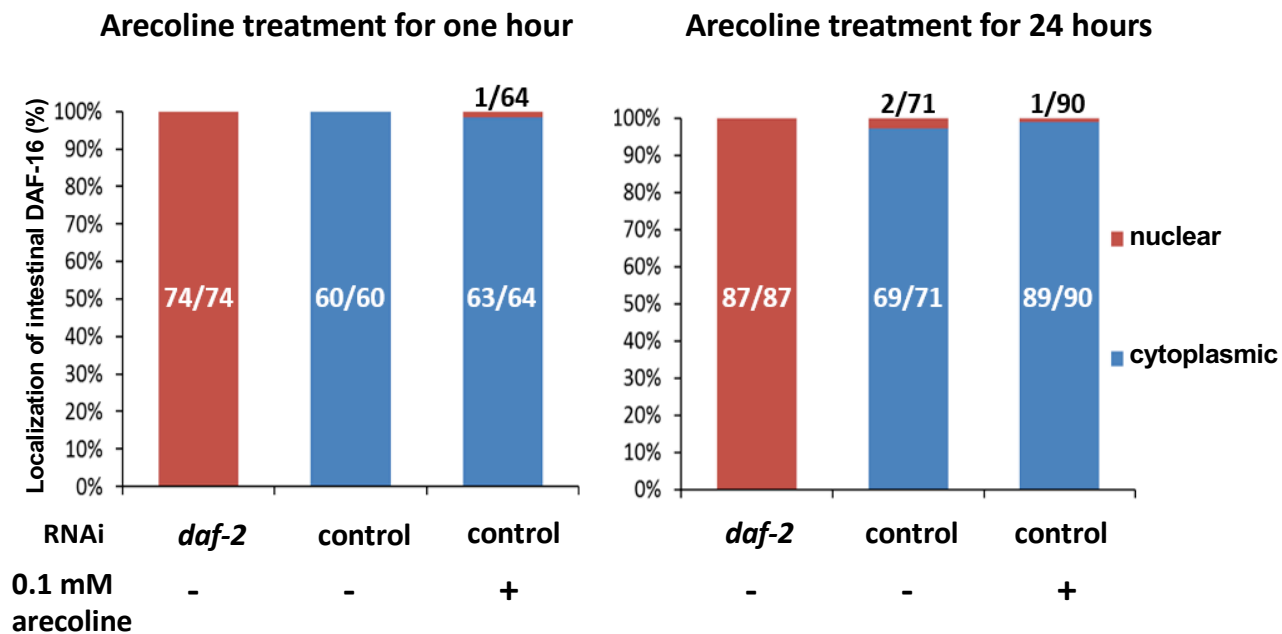

**B.**

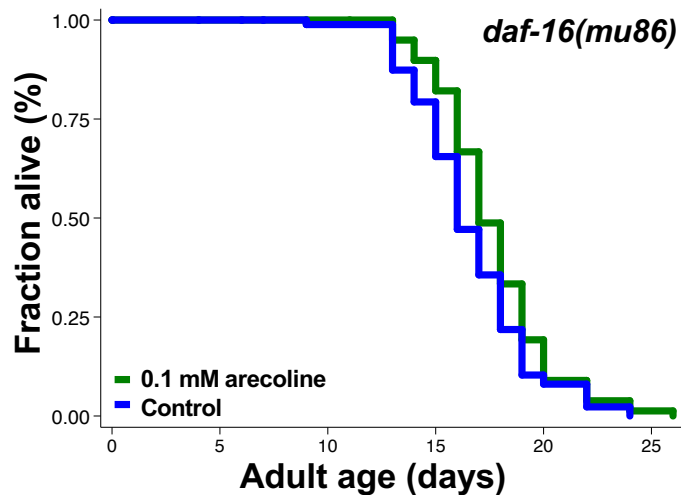

**Figure S1. Arecoline-induced longevity is partially dependent on DAF-16**

**A.** DAF-16::GFP subcellular localization assay. Day 1 transgenic worms expressing DAF-16::GFP grown on bacteria containing empty vector were treated with or without 0.1 mM arecoline for one and 12 hours. Worms fed with *daf-2* RNA bacteria were served as positive controls. Results show the percentage of worms showing cytosolic (blue) and nuclear (red) localization of DAF-16. n=60–90 worms per condition.

**B.** Survival curves of *daf-16(mu86)* mutants with vehicle (blue) or 0.1 mM arecoline (green) from adult Day 4 to Day 6.  $p = 0.0351$ . *P*-values are derived from log-rank test. The graphs are representative of three independent experiments.

10

**Table S1. Statistical data for lifespan experiments, Related to Figures 1 and S1.**

|   | Strain                      | Treatment         | Mean Lifespan<br>±SEM | 75% Percentile (Days) | n       | P value                    | Extension (%) |
|---|-----------------------------|-------------------|-----------------------|-----------------------|---------|----------------------------|---------------|
| * | N2                          | 0 mM              | 22.05±0.95            | 27                    | 65/72   |                            |               |
| * | N2                          | 0.2 mM whole life | 7.60±0.54             | 9                     | 61/72   | <0.00001                   | -65.5         |
| * | N2                          | 0.2 mM D1-D3      | 19.54±0.80            | 25                    | 67/72   | 0.1173                     | -11.4         |
|   | N2                          | 0 mM              | 19.16±0.81            | 23                    | 55/69   |                            |               |
|   | N2                          | 0.2 mM whole life | 7.38±0.50             | 9                     | 57/72   | <0.00001                   | -61.5         |
|   | N2                          | 0 mM              | 14.81±0.50            | 18                    | 65/75   |                            |               |
|   | N2                          | 0.2 mM D1-D3      | 11.78±0.74            | 16                    | 59/79   | 0.0741                     | -20.5         |
|   | N2                          | 0.2 mM D4-D6      | 20.01±0.76            | 24                    | 54/82   | <0.00001                   | 35.1          |
| * | N2                          | 0 mM              | 26.68±0.83            | 29                    | 60/72   |                            |               |
| * | N2                          | 0.2 mM D3-D5      | 28.19±0.85            | 33                    | 60/72   | 0.1389                     | 5.7           |
| * | N2                          | 0.2 mM D4-D6      | 30.31±0.52            | 35                    | 64/72   | 0.0002                     | 13.6          |
|   | N2                          | 0.2 mM D5-D7      | 30.25±0.78            | 35                    | 61/72   | 0.0004                     | 13.4          |
|   | N2                          | 0 mM              | 24.19±0.65            | 28                    | 46/68   |                            |               |
|   | N2                          | 0.2 mM D6-D8      | 23.75±0.92            | 28                    | 56/77   | 0.8875                     |               |
|   | N2                          | 0 mM              | 25.96±2.04            | 31                    | 49/73   |                            |               |
|   | N2                          | 0.2 mM D4-D6      | 27.64±2.51            | 33                    | 57/73   | 0.071                      | 6.5           |
|   | N2                          | 0.2 mM D5-D7      | 29.14±1.84            | 35                    | 55/73   | 0.0044                     | 12.3          |
|   | N2                          | 0.2 mM D6-D8      | 25.41±1.04            | 31                    | 56/75   | 0.5953                     |               |
|   | N2                          | 0 mM              | 26.02±0.72            | 29                    | 67/72   |                            |               |
|   | N2                          | 0.1 mM D4-D6      | 28.14±0.83            | 33                    | 69/72   | 0.0272                     | 8.2           |
|   | N2                          | 0.2 mM D4-D6      | 28.67±0.86            | 33                    | 65/72   | 0.0061                     | 10.2          |
|   | N2                          | 0 mM              | 27.31±0.52            | 31                    | 58/72   |                            |               |
|   | N2                          | 0.004 mM D4-D6    | 29.19±0.85            | 33                    | 62/76   | 0.0647                     | 6.9           |
|   | N2                          | 0.02 mM D4-D6     | 28.84±0.46            | 33                    | 51/65   | 0.1309                     | 5.6           |
|   | N2                          | 0.1 mM D4-D6      | 30.24±1.00            | 33                    | 56/72   | 0.0066                     | 10.6          |
|   | N2                          | 0 mM              | 25.46±1.33            | 29                    | 73/84   |                            |               |
|   | N2                          | 0.05 mM D4-D6     | 27.02±1.53            | 31                    | 73/84   | 0.1863                     | 6.1           |
|   | N2                          | 0.1 mM D4-D6      | 28.01±1.52            | 33                    | 71/84   | 0.0423                     | 10            |
| * | N2                          | 0 mM              | 25.71±0.95            | 29                    | 72/83   |                            |               |
|   | N2                          | 0.05 mM D4-D6     | 28.42±0.82            | 33                    | 70/83   | 0.0053                     | 9.5           |
| * | N2                          | 0.1 mM D4-D6      | 29.01±1.00            | 33                    | 65/83   | 0.0007                     | 12.8          |
| * | gar-1(ok755)                | 0 mM              | 26.54±0.68            | 31                    | 68/85   |                            |               |
| * | gar-1(ok755)                | 0.1 mM D4-D6      | 29.78±0.81            | 33                    | 66/84   | 0.0009                     | 12.2          |
|   | gar-1(ok755)                | 0 mM              | 25.33±1.03            | 30                    | 82/84   |                            |               |
|   | gar-1(ok755)                | 0.1 mM D4-D6      | 27.31±1.00            | 32                    | 77/84   | 0.0391                     | 7.8           |
| * | gar-2(ok520)                | 0 mM              | 24.89±1.47            | 30                    | 68/84   |                            |               |
| * | gar-2(ok520)                | 0.1 mM D4-D6      | 24.47±1.33            | 30                    | 69/84   | 0.897                      |               |
|   | gar-2(ok520)                | 0 mM              | 25.83±1.09            | 31                    | 64/84   |                            |               |
|   | gar-2(ok520)                | 0.1 mM D4-D6      | 25.97±0.95            | 31                    | 51/84   | 0.9372                     |               |
|   | gar-2(ok520)                | 0 mM              | 25.15±1.33            | 29                    | 74/84   |                            |               |
|   | gar-2(ok520)                | 0.1 mM D4-D6      | 25.95±1.81            | 33                    | 67/84   | 0.7197                     |               |
| * | gar-3(gk305)                | 0 mM              | 24.54±1.30            | 27                    | 62/84   |                            |               |
| * | gar-3(gk305)                | 0.1 mM D4-D6      | 27.61±1.15            | 33                    | 57/84   | 0.0227                     | 12.5          |
|   | gar-3(gk305)                | 0 mM              | 28.29±0.87            | 34                    | 78/84   |                            |               |
|   | gar-3(gk305)                | 0.1 mM D4-D6      | 30.46±1.15            | 36                    | 68/84   | 0.0566                     | 7.7           |
|   | gar-3(gk305)                | 0 mM              | 30.40±0.63            | 35                    | 60/84   |                            |               |
|   | gar-3(gk305)                | 0.1 mM D4-D6      | 32.42±0.68            | 35                    | 69/84   | 0.0417                     | 6.6           |
|   | egl-8(n488)                 | 0 mM              | 39.36±1.08            | 46                    | 99/120  |                            |               |
|   | egl-8(n488)                 | 0.1 mM D4-D6      | 39.53±0.78            | 44                    | 86/120  | 0.8892                     |               |
|   | egl-8(n488)                 | 0 mM              | 35.90±1.73            | 42                    | 96/120  |                            |               |
|   | egl-8(n488)                 | 0.1 mM D4-D6      | 35.28±0.86            | 42                    | 101/120 | 0.7125                     |               |
|   | egl-8(n488)                 | 0 mM              | 37.99±0.69            | 43                    | 100/120 |                            |               |
|   | egl-8(n488)                 | 0.1 mM D6-D8      | 37.37±0.75            | 41                    | 95/120  | 0.4018                     |               |
| * | N2                          |                   | 21.55±0.59            | 23                    | 53/84   |                            |               |
| * | gar-2(ok520)                |                   | 22.43±0.44            | 25                    | 64/84   |                            |               |
| * | gar-2(ok520); myo-3p::gar-2 |                   | 21.69±0.68            | 23                    | 57/83   | 0.4667 (vs gar-2(ok520))   | -3.3          |
| * | gar-2(ok520); acr-2p::gar-2 |                   | 25.94±0.99            | 31                    | 66/83   | 0.0004 (vs gar-2(ok520))   | 15.7          |
| * | +unc-25p::gar-2             |                   | 24.85±0.78            | 27                    | 61/84   |                            |               |
|   | gar-2(ok520)                |                   | 23.06±0.66            | 25                    | 57/84   |                            |               |
|   | gar-2(ok520); myo-3p::gar-2 |                   | 22.58±0.38            | 25                    | 74/84   | 0.6749 (vs gar-2(ok520))   | -2.1          |
|   | gar-2(ok520); acr-2p::gar-2 |                   | 26.42±0.53            | 29                    | 76/84   | <0.00001 (vs gar-2(ok520)) | 14.6          |
|   | +unc-25p::gar-2             |                   | 24.89±1.47            | 30                    | 68/84   |                            |               |
| * | gar-2(ok520)                | 0.1 mM D4-D6      | 24.47±1.33            | 30                    | 69/84   | 0.6837                     |               |
| * | gar-2(ok520); myo-3p::gar-2 | 0 mM              | 21.52±0.55            | 23                    | 67/84   |                            |               |
| * | gar-2(ok520); myo-3p::gar-2 | 0.1 mM D4-D6      | 20.82±0.67            | 23                    | 66/84   | 0.2625                     |               |
|   | gar-2(ok520); myo-3p::gar-2 | 0 mM              | 20.86±0.43            | 23                    | 61/84   |                            |               |
|   | gar-2(ok520); myo-3p::gar-2 | 0.1 mM D4-D6      | 20.14±0.31            | 21                    | 66/84   | 0.1097                     |               |
|   | gar-2(ok520); acr-2p::gar-2 | 0 mM              | 22.54±0.42            | 25                    | 78/84   |                            |               |
| * | +unc-25p::gar-2             |                   | 24.21±0.52            | 26                    | 75/84   | 0.0302                     | 7.4           |
|   | gar-2(ok520); acr-2p::gar-2 | 0 mM              | 23.00±0.55            | 25                    | 65/84   |                            |               |
|   | +unc-25p::gar-2             |                   | 24.45±0.44            | 25                    | 62/84   | 0.0523                     | 6.3           |
|   | gar-2(ok520); acr-2p::gar-2 | 0.1 mM D4-D6      | 24.31±0.53            | 27                    | 70/84   |                            |               |
|   | +unc-25p::gar-2             |                   | 25.76±0.46            | 29                    | 71/84   | 0.0541                     | 6             |
|   | gar-2(ok520); acr-2p::gar-2 | 0.1 mM D4-D6      | 25.76±0.46            | 29                    | 71/84   | 0.0541                     | 6             |
|   | daf-16(mu86)                | 0 mM              | 17.34±0.25            | 19                    | 66/84   |                            |               |
|   | daf-16(mu86)                | 0.1 mM D4-D6      | 18.40±0.37            | 20                    | 66/84   | 0.0311                     | 6.1           |
|   | daf-16(mu86)                | 0 mM              | 16.64±0.36            | 18                    | 87/96   |                            |               |
|   | daf-16(mu86)                | 0.1 mM D4-D6      | 17.63±0.34            | 19                    | 78/96   | 0.0112                     | 6             |

|                                       |              |            |    |        |        |       |
|---------------------------------------|--------------|------------|----|--------|--------|-------|
| <i>daf-16(mu86)</i>                   | 0 mM         | 16.35±0.35 | 18 | 62/84  |        |       |
| <i>daf-16(mu86)</i>                   | 0.1 mM D4-D6 | 17.47±0.47 | 19 | 64/84  | 0.0321 | 6.9   |
| RB756: <i>gar2(ok520)</i>             |              | 22.25±0.63 | 25 | 76/84  |        |       |
| EQ1023: <i>gar-2(ok520) 6X</i>        |              | 21.56±0.48 | 25 | 70/84  | 0.2603 |       |
| <b><i>tom-1</i> RNAi treatment</b>    |              |            |    |        |        |       |
| N2 on EV                              |              | 19.93±0.67 | 25 | 91/110 |        |       |
| N2 on <i>tom-1</i> RNAi (eggs)        |              | 18.89±0.79 | 23 | 76/99  | 0.2952 |       |
| * N2 on EV                            |              | 18.49±1.30 | 23 | 72/111 |        |       |
| * N2 on <i>tom-1</i> RNAi (from Day1) |              | 15.57±0.79 | 19 | 78/105 | 0.0005 | -15.8 |
| * N2 on EV                            |              | 19.22±0.75 | 22 | 50/68  |        |       |
| * N2 on <i>tom-1</i> RNAi (from Day5) |              | 21.27±0.77 | 25 | 59/66  | 0.0434 | 10.4  |
| N2 on EV                              |              | 15.63±0.90 | 18 | 54/72  |        |       |
| N2 on <i>tom-1</i> RNAi (eggs)        |              | 15.57±1.00 | 18 | 57/72  | 0.8269 |       |
| N2 on <i>tom-1</i> RNAi (from Day1)   |              | 15.72±1.04 | 18 | 59/72  | 0.8358 |       |
| N2 on <i>tom-1</i> RNAi (from Day5)   |              | 17.17±0.76 | 20 | 59/72  | 0.0287 | 9.9   |

Adult mean lifespan, in days, observed in lifespan analysis. Lifespan experiments were carried out at 20 °C, unless noted otherwise. '75%' is the mean lifespan of the 75<sup>th</sup> percentile. 'n' shows number of observed deaths relative to total number of animals started. The difference between these numbers represents the number of animals censored during the experiment, and includes animals that exploded, bagged, or crawled off the plates. '% LS change' is the percentage of lifespan extension compared to the control. *P* values were calculated by pair-wise comparisons to the control, each consisting of control and experimental animals examined at the same time. We used Stata 12 software for statistical analysis and to determine means and percentiles. The logrank or Wilcoxon test was used to test the hypothesis that the survival functions among groups were equal. Repetitions of the same experiments are listed in order. '\*\*' indicates the sets of experiments plotted and shown in Figures.
